# Supplementary material for: Macrophage migration inhibitory factor: a potential biomarker for chronic low back pain in patients with Modic changes
Source: HighWire-hosted journal article supplement (doi:10.1136/rmdopen-2021-001726), 2021-08-01
Supplement: rmdopen-2021-001726supp001_data_supplement.pdf [file rmdopen-2021-001726supp001_data_supplement.pdf]

1 Supplementary

2 **Table 3:** Correlations between low back pain intensity (NRS) and cytokines

| <b>Low back pain intensity (NRS)</b> |                                    |                  |
|--------------------------------------|------------------------------------|------------------|
| <b>Cytokine</b>                      | <b>Correlation coefficients, r</b> | <b>p-values</b>  |
| IL-1 $\beta$                         | 0.09                               | 0.30             |
| IL-2                                 | 0.25                               | 0.004            |
| IL-4                                 | 0.20                               | 0.03             |
| IL-6                                 | <b>0.41</b>                        | <b>&lt;0.001</b> |
| IL-8                                 | 0.15                               | 0.09             |
| IL-10                                | 0.25                               | 0.005            |
| IL-16                                | <b>0.49</b>                        | <b>&lt;0.001</b> |
| IFN- $\gamma$                        | 0.23                               | 0.008            |
| TNF- $\alpha$                        | 0.19                               | 0.03             |
| MIF                                  | <b>0.38</b>                        | <b>&lt;0.001</b> |
| GM-CSF                               | 0.11                               | 0.23             |
| CCL1                                 | 0.24                               | 0.006            |
| CCL2                                 | 0.18                               | 0.04             |
| CCL3                                 | 0.18                               | 0.04             |
| CCL7                                 | 0.20                               | 0.03             |
| CCL8                                 | 0.20                               | 0.02             |
| CCL11                                | 0.22                               | 0.01             |
| CCL13                                | 0.06                               | 0.53             |
| CCL15                                | 0.23                               | 0.01             |
| CCL17                                | 0.22                               | 0.02             |
| CCL19                                | <b>0.30</b>                        | <b>0.001</b>     |
| CCL20                                | <b>0.41</b>                        | <b>&lt;0.001</b> |

|        |             |                  |
|--------|-------------|------------------|
| CCL21  | 0.23        | 0.009            |
| CCL22  | <b>0.41</b> | <b>&lt;0.001</b> |
| CCL23  | 0.24        | 0.008            |
| CCL24  | 0.06        | 0.50             |
| CCL25  | 0.27        | 0.002            |
| CCL26  | <b>0.31</b> | <b>&lt;0.001</b> |
| CCL27  | <b>0.45</b> | <b>&lt;0.001</b> |
| CXCL1  | 0.08        | 0.37             |
| CXCL2  | 0.05        | 0.59             |
| CXCL6  | 0.18        | 0.05             |
| CXCL9  | 0.10        | 0.24             |
| CXCL10 | 0.13        | 0.15             |
| CXCL11 | 0.07        | 0.46             |
| CXCL12 | 0.20        | 0.03             |
| CXCL13 | <b>0.32</b> | <b>&lt;0.001</b> |
| CXCL16 | 0.20        | 0.03             |
| CX3CL1 | <b>0.44</b> | <b>&lt;0.001</b> |

1 NRS=numerical rating scale.

2 Correlations between low back pain intensity and cytokines. Significant p-values after correction for multiple  
3 comparisons are in bold.

4

5
